# Supplementary material for: The pH-dependent photochemistry of anthraquinone-2-sulfonate
Source: Royal Society of Chemistry journal article supplement (doi:10.1039/b9pp00103d), 2010-01-28
Supplement: b9pp00103d.pdf [file b9pp00103d.pdf]

## **ELECTRONIC SUPPLEMENTARY INFORMATION**

### **THE pH-DEPENDENT PHOTOCHEMISTRY OF ANTHRAQUINONE-2-SULPHONATE**

**Pratap Reddy Maddigapu,<sup>a</sup> Andra Bedini,<sup>a</sup> Claudio Minero,<sup>a</sup> Valter Maurino,<sup>a</sup> Davide Vione,<sup>a,\*</sup> Marcello Brigante,<sup>b,\*</sup> Gilles Mailhot,<sup>b,c</sup> Mohamed Sarakha<sup>b</sup>**

<sup>a</sup> *Dipartimento di Chimica Analitica, Università di Torino, Via P. Giuria 5, 10125 Torino, Italy.*

<http://www.chimicadellambiente.unito.it>

<sup>b</sup> *Clermont Université, Université Blaise Pascal, Laboratoire de Photochimie Moléculaire et Macromoléculaire (LPMM), F-63000, Clermont-Ferrand, France.*

<sup>c</sup> *CNRS, UMR 6505, F-63177 Aubière*

\* Address correspondence to either author. E-mail: [davide.vione@unito.it](mailto:davide.vione@unito.it) (D.V.); [marcello.brigante@univ-bpclermont.fr](mailto:marcello.brigante@univ-bpclermont.fr) (M.B.).

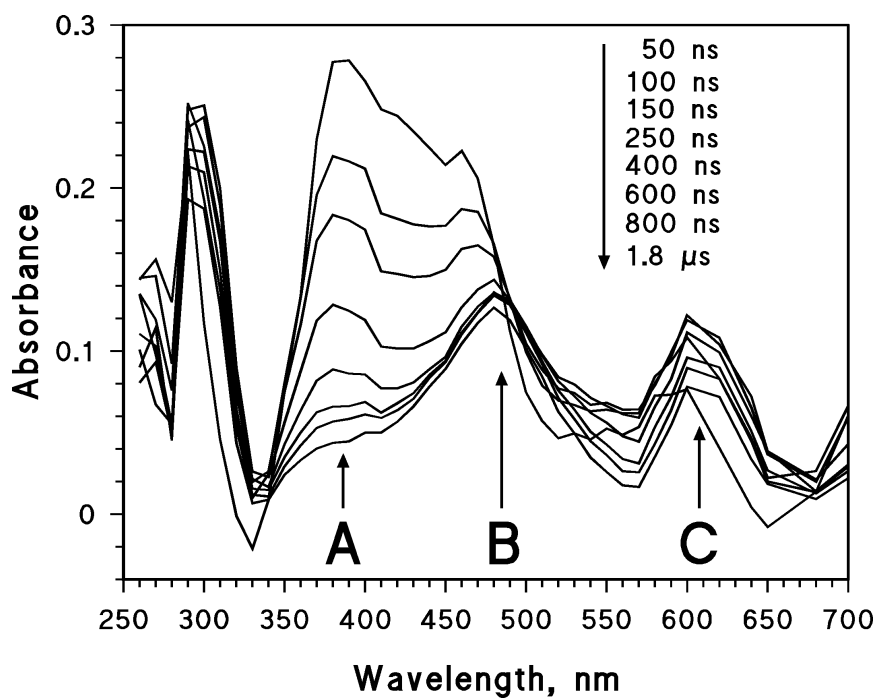

**Figure ESI1.** Time evolution of the spectrum of 0.1 mM AQ2S, excited by a 30 mJ laser pulse at 355 nm, in the 50-1800 ns time scale, in Milli-Q water (pH = 6.5). The absorption maxima of the three identified transient species are also highlighted.

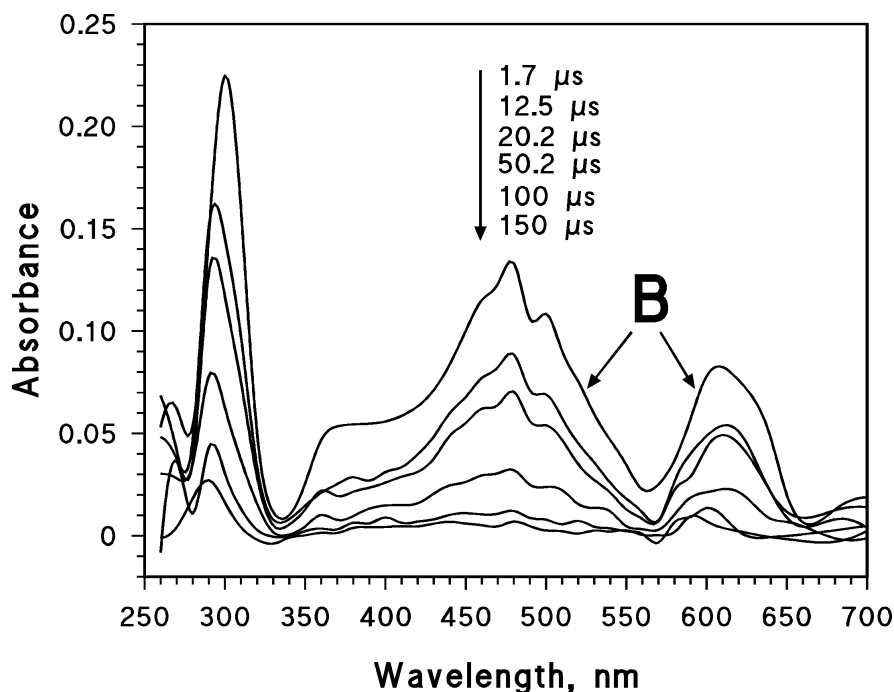

**Figure ESI2.** Time evolution of the spectrum of 0.1 mM AQ2S, excited by a 30 mJ laser pulse at 355 nm, in the 1.7-150  $\mu$ s time scale, in Milli-Q water (pH = 6.5). The absorption spectrum of B is also highlighted.

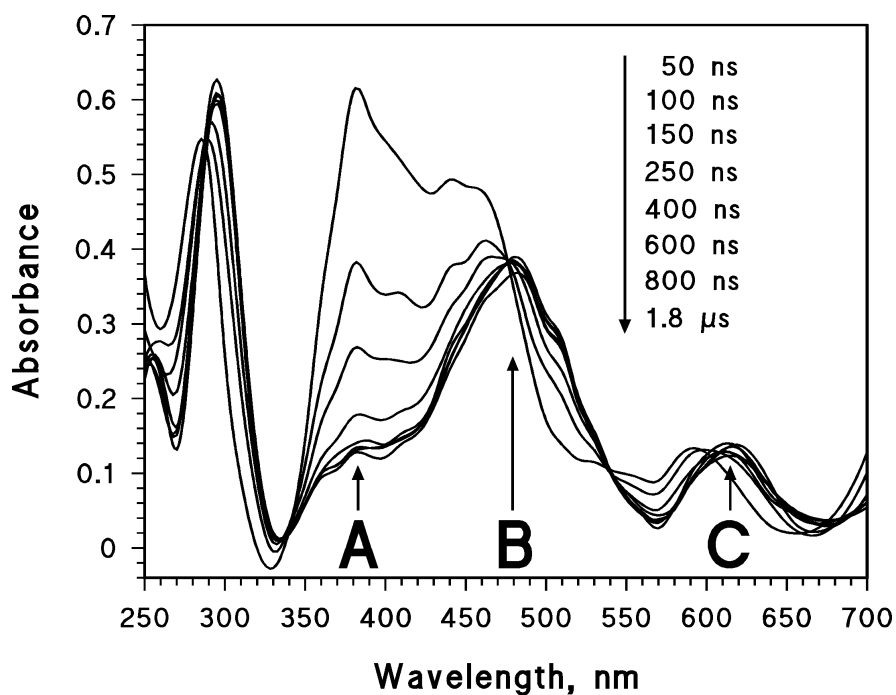

**Figure ESI3.** Time evolution of the spectrum of 0.2 mM AQ2S at pH 2.5, excited by a 30 mJ laser pulse at 355 nm, in the 50-1800 ns time scale. The absorption maxima of the three identified transient species are also highlighted.

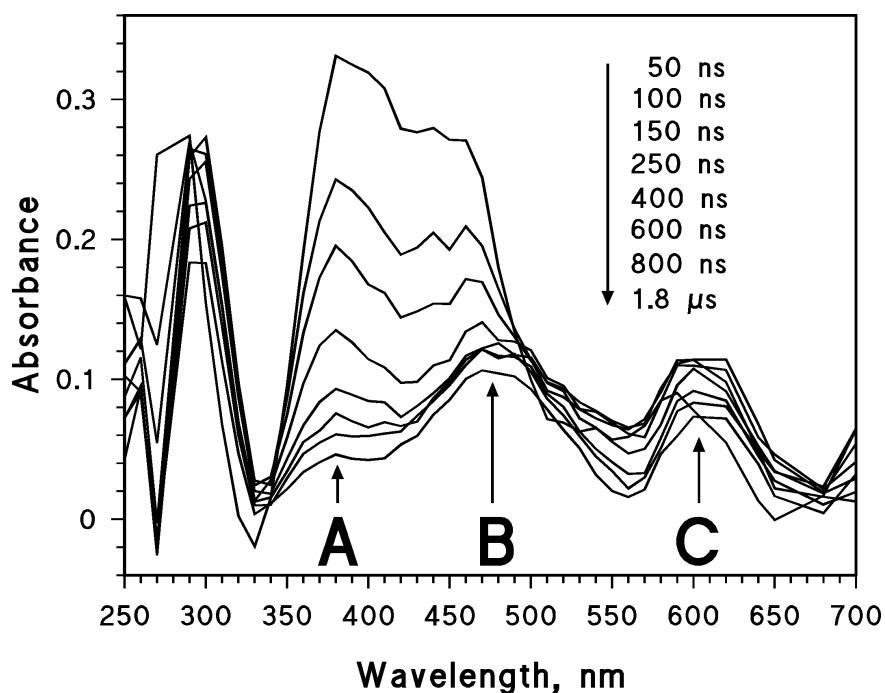

**Figure ESI4.** Time evolution of the spectrum of 0.1 mM AQ2S at pH 9.0, excited by a 30 mJ laser pulse at 355 nm, in the 50-1800 ns time scale. The absorption maxima of the three identified transient species are also highlighted.

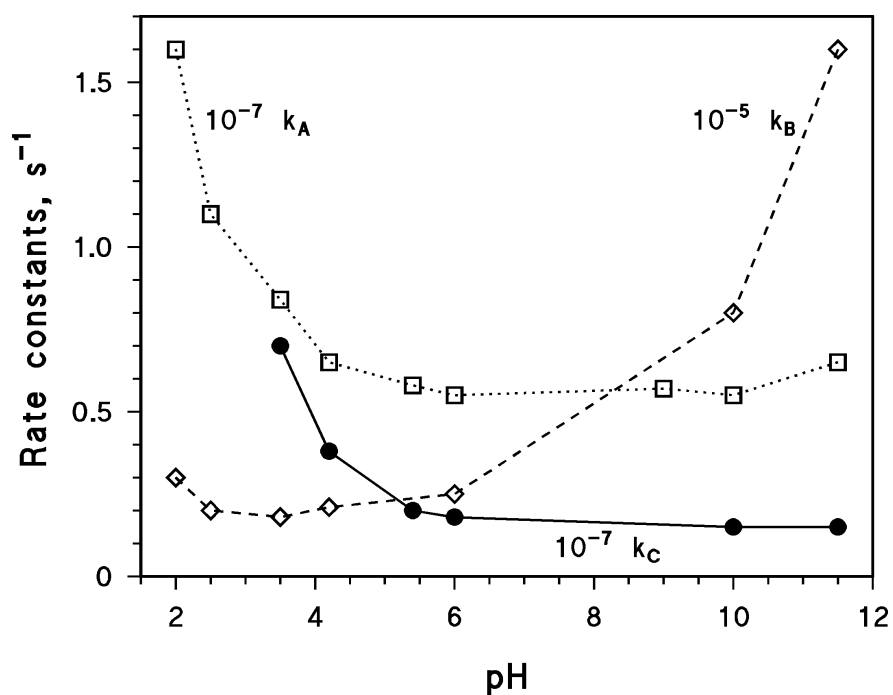

**Figure ESI5.** pH trend of the pseudo-first order degradation rate constants of the three identified transient species. Note that  $k_A$  and  $k_C$  are around two orders of magnitude higher than  $k_B$ . Laser pulse: 30 mJ, 355 nm, 0.1 mM AQ2S.

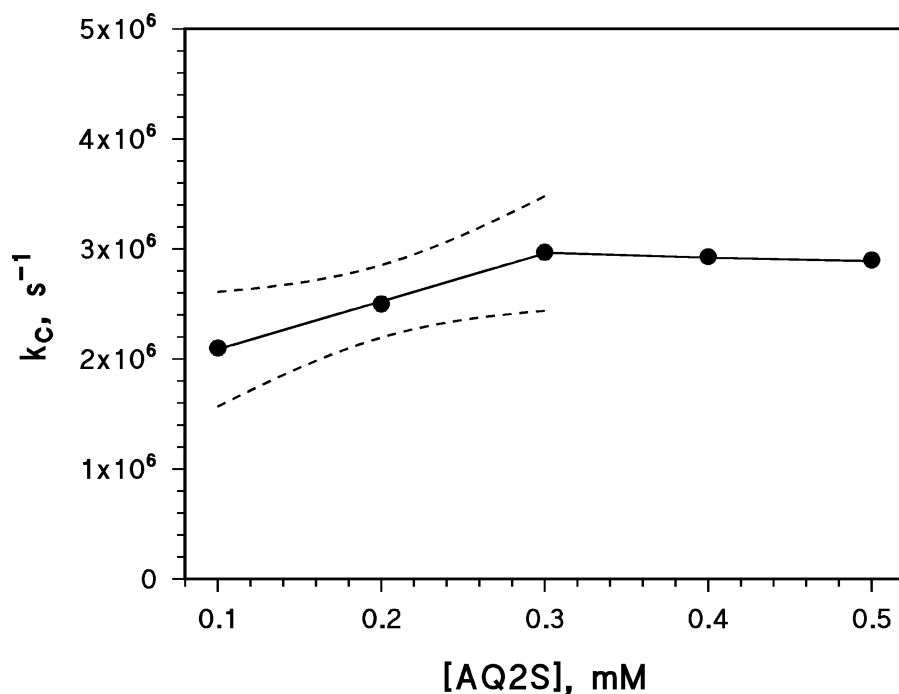

**Figure ESI6.** Trend of  $k_C$  as a function of [AQ2S]. The linear part is highlighted, together with the 95% error bounds to the regression line. Laser pulse: 30 mJ, 355 nm.

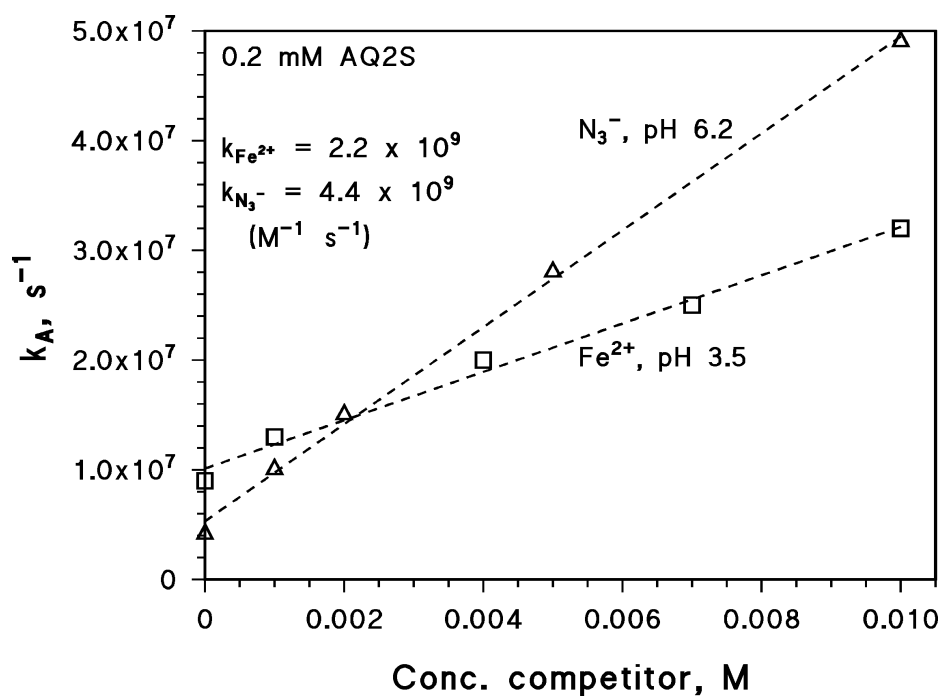

**Figure ESI7.** Trend of  $k_A$  as a function of the concentrations of  $\text{Fe}^{2+}$  and  $\text{N}_3^-$ . The second-order reaction rate constants between A and the competitors are also reported. They were derived as the slope of the experimental lines. Laser pulse: 30 mJ, 355 nm.

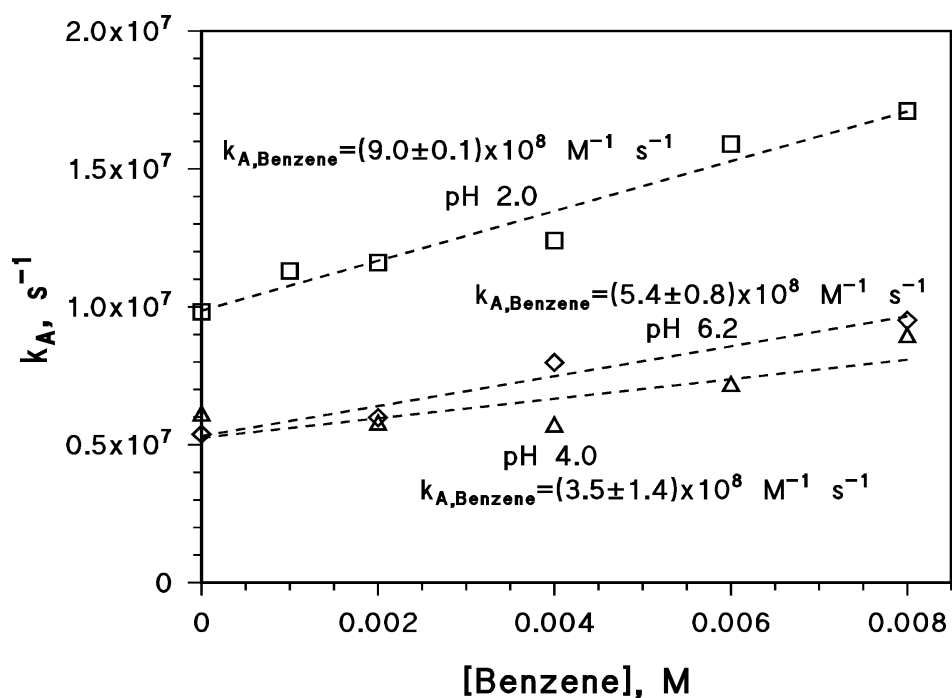

**Figure ESI8.** Pseudo-first order degradation rate constant of the transient species A, produced upon irradiation of 0.1 mM AQ2S, as a function of the concentration of added benzene. The pH was adjusted by addition of HClO<sub>4</sub>. The reported values of  $k_{A,Benzene}$  are derived from the slopes of the relevant lines ( $k_{A,Benzene} = k_A [Benzene]^{-1}$ ). Laser pulse: 30 mJ, 355 nm.

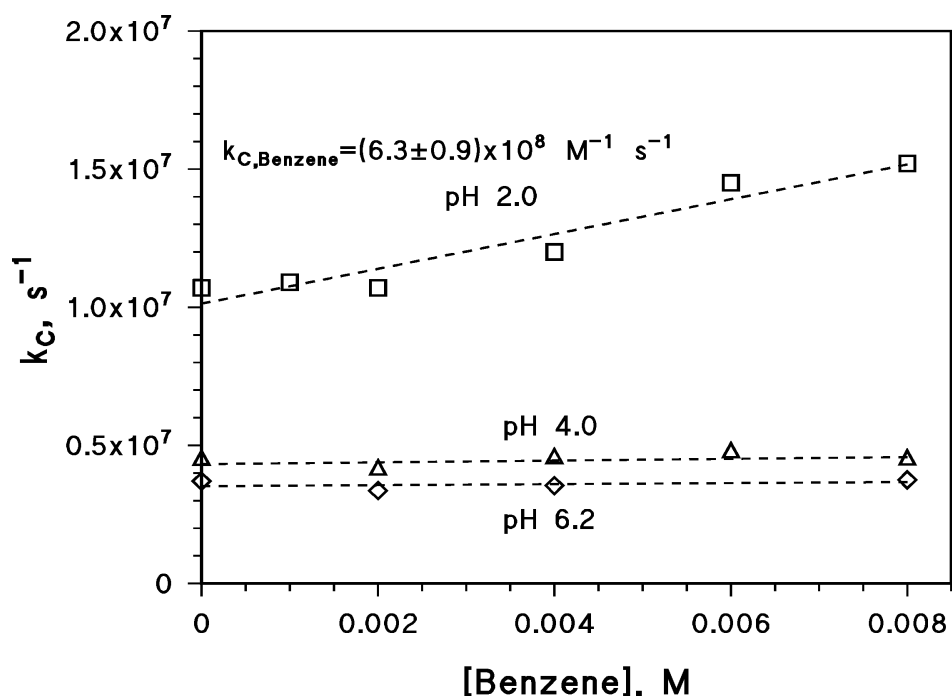

**Figure ESI9.** Pseudo-first order degradation rate constant of the transient species C, produced upon irradiation of 0.1 mM AQ2S, as a function of the concentration of added benzene. The pH was adjusted by addition of HClO<sub>4</sub>. The reported values of  $k_{C,Benzene}$  are derived from the slopes of the relevant lines ( $k_{C,Benzene} = k_C [Benzene]^{-1}$ ). Laser pulse: 30 mJ, 355 nm.

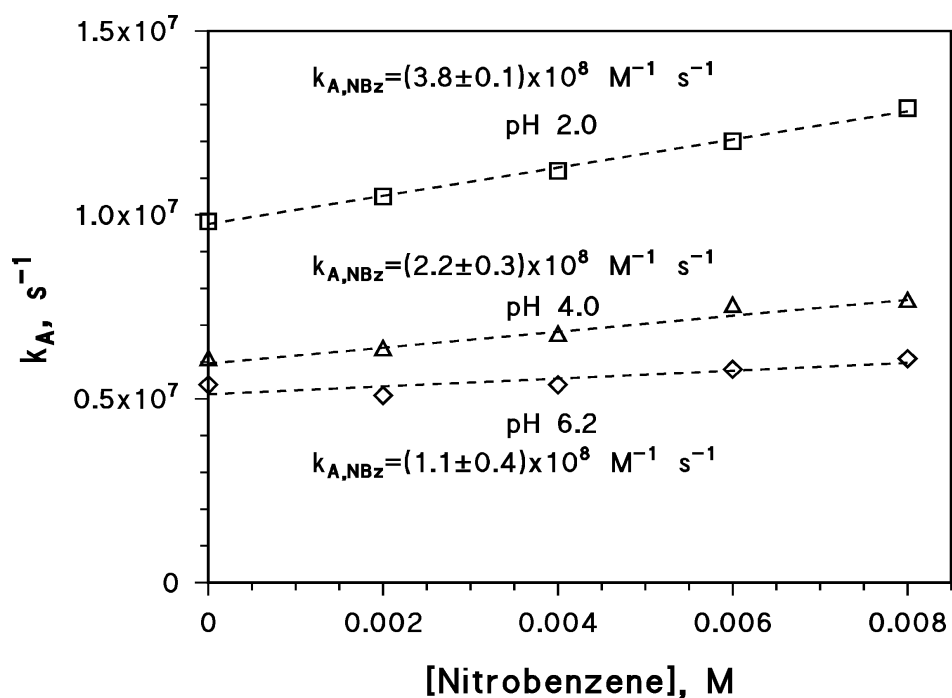

**Figure ESI10.** Pseudo-first order degradation rate constant of the transient species A, produced upon irradiation of 0.1 mM AQ2S, as a function of the concentration of added nitrobenzene (NBz). The pH was adjusted by addition of HClO<sub>4</sub>. The reported values of  $k_{A,NBz}$  are derived from the slopes of the relevant lines ( $k_{A,NBz} = k_A [\text{NBz}]^{-1}$ ). Laser pulse: 30 mJ, 355 nm.

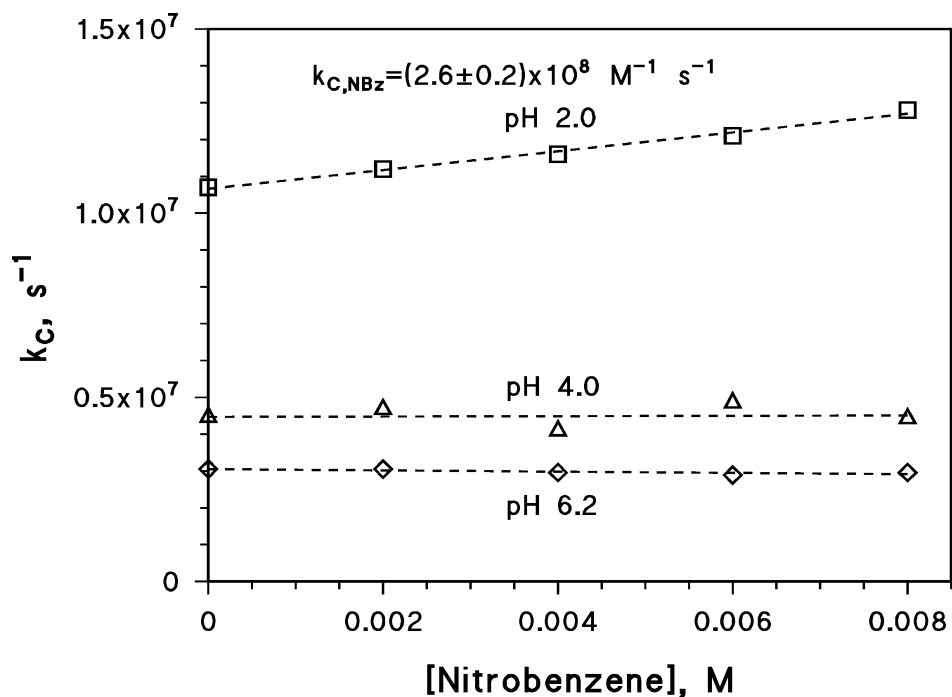

**Figure ESI11.** Pseudo-first order degradation rate constant of the transient species C, produced upon irradiation of 0.1 mM AQ2S, as a function of the concentration of added nitrobenzene (NBz). The pH was adjusted by addition of HClO<sub>4</sub>. The reported values of  $k_{C,NBz}$  are derived from the slopes of the relevant lines ( $k_{C,NBz} = k_C [\text{NBz}]^{-1}$ ). Laser pulse: 30 mJ, 355 nm.
